# Supplementary material for: A transparent projection screen based on plasmonic Ag nanocubes
Source: Royal Society of Chemistry journal article supplement (doi:10.1039/c5nr06766a), 2015-01-01
Supplement: c5nr06766a1.pdf [file c5nr06766a1.pdf]

## Supplementary Information

### Transparent projection screen based on plasmonic Ag nanocubes

Koichiro Saito, Tetsu Tastuma\*

#### Experimental

*Synthesis of Ag nanocubes:* Ag nanocubes were synthesized as follows. Ethylene glycol (5 mL) was stirred at 140-145 °C in a 20 mL capped vial for 1 h, followed by addition of 3 mM HCl in ethylene glycol (1 mL). After stirring in the capped vial for 10 min, 94 mM AgNO<sub>3</sub> in ethylene glycol (3 mL) and 147 mM poly(vinylpyrrolidone) (monomer unit, *Mr* ~ 55000) in ethylene glycol (3 mL) were added simultaneously to the stirred solution at 45 mL h<sup>-1</sup>, followed by stirring in the capped vial at 140-145 °C for about 2 h. The nanocubes were precipitated by addition of excess acetone, separated by centrifugation at 2000g and resuspended in ethanol.

**Table S1.** Extinction cross section of a 100 nm Ag nanocube on a 40, 110, or 160 nm thick TiO<sub>2</sub> film and electric field intensity in the distal or proximal region for a TiO<sub>2</sub> film without Ag nanocube calculated by an FDTD method.

| TiO <sub>2</sub> thickness<br>[nm] | Distal region <sup>a</sup> |                         | Proximal region <sup>b</sup> |                         |
|------------------------------------|----------------------------|-------------------------|------------------------------|-------------------------|
|                                    | Extinction <sup>c</sup>    | <i>E</i> <sup>2 c</sup> | Extinction <sup>c</sup>      | <i>E</i> <sup>2 c</sup> |
| 40                                 | 1.00                       | 1.00                    | 1.00                         | 1.00                    |
| 110                                | 0.86                       | 0.88                    | 2.56                         | 3.00                    |
| 160                                | 0.65                       | 0.73                    | 0.93                         | 2.42                    |

<sup>a</sup>72-102 nm away from the TiO<sub>2</sub> surface.

<sup>b</sup>2-32 nm away from the TiO<sub>2</sub> surface.

<sup>c</sup>Normalized at the 40 nm thick TiO<sub>2</sub>.

**Table S2.** Viewing angle dependence of the backward scattering in the case of a 100 nm Ag nanocube on a 110 nm thick TiO<sub>2</sub> film.

| Viewing angle [degree] | Scattering(455 nm)/Scattering(636 nm) |
|------------------------|---------------------------------------|
| 0 <sup>a</sup>         | 3.0                                   |
| 15                     | 2.7                                   |
| 30                     | 1.9                                   |

<sup>a</sup>Normal to the substrate.
